# Supplementary material for: Using Machine Learning and Molecular Docking to Leverage Urease Inhibition Data for Virtual Screening
Source: MDPI journal article supplement (doi:10.3390/ijms24098180), 2023-05-03
Supplement: s1 [file s1]

# Supplementary Materials: Using Machine Learning and Molecular Docking to Leverage Urease Inhibition Data for Virtual Screening

Natália Aniceto <sup>1,2</sup>, Tânia S. Albuquerque <sup>3</sup>, Vasco D. B. Bonifácio <sup>3,4</sup>, Rita C. Guedes <sup>1,2</sup> and Nuno Martinho <sup>3,\*</sup>

<sup>1</sup> Research Institute for Medicines (iMed.Ulisboa), Faculty of Pharmacy, Universidade de Lisboa, 1649-003 Lisbon, Portugal

<sup>2</sup> Department of Pharmaceutical Sciences and Medicines, Faculty of Pharmacy, Universidade de Lisboa, 1649-003 Lisbon, Portugal

<sup>3</sup> iBB—Institute for Bioengineering and Biosciences, and Associate Laboratory i4HB—Institute for Health and Bioeconomy at Instituto Superior Técnico, Universidade de Lisboa, Av. Rovisco Pais, 1049-001 Lisboa, Portugal

<sup>4</sup> Bioengineering Department, Instituto Superior Técnico, Universidade de Lisboa, Av. Rovisco Pais, 1049-001 Lisboa, Portugal

\* Correspondence: [nunomartinho@tecnico.ulisboa.pt](mailto:nunomartinho@tecnico.ulisboa.pt)

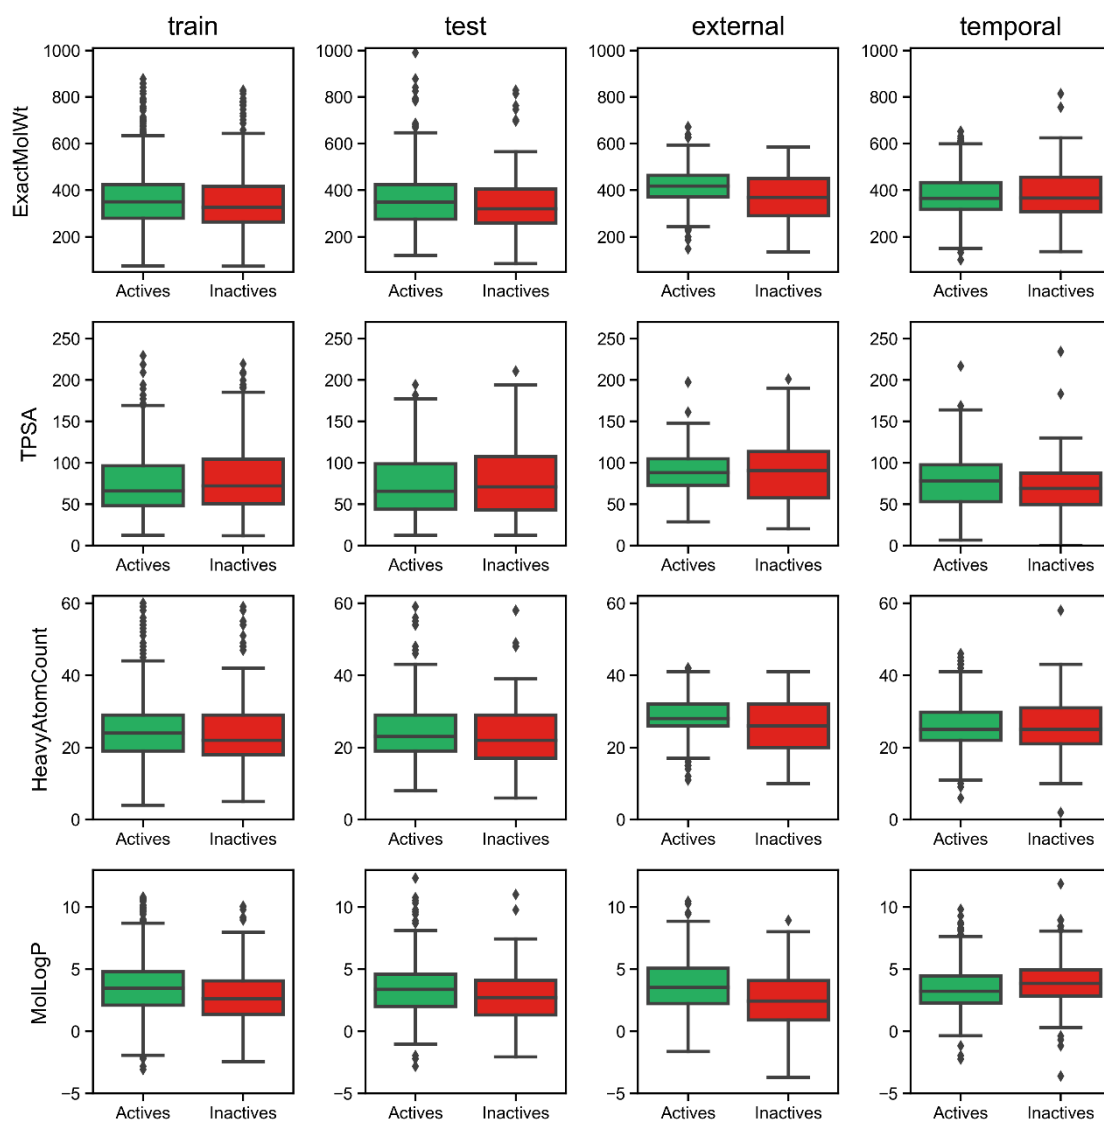

**Figure S1.** Distribution of chemical properties of the different dataset tested between active (green) and inactive (red) classes.

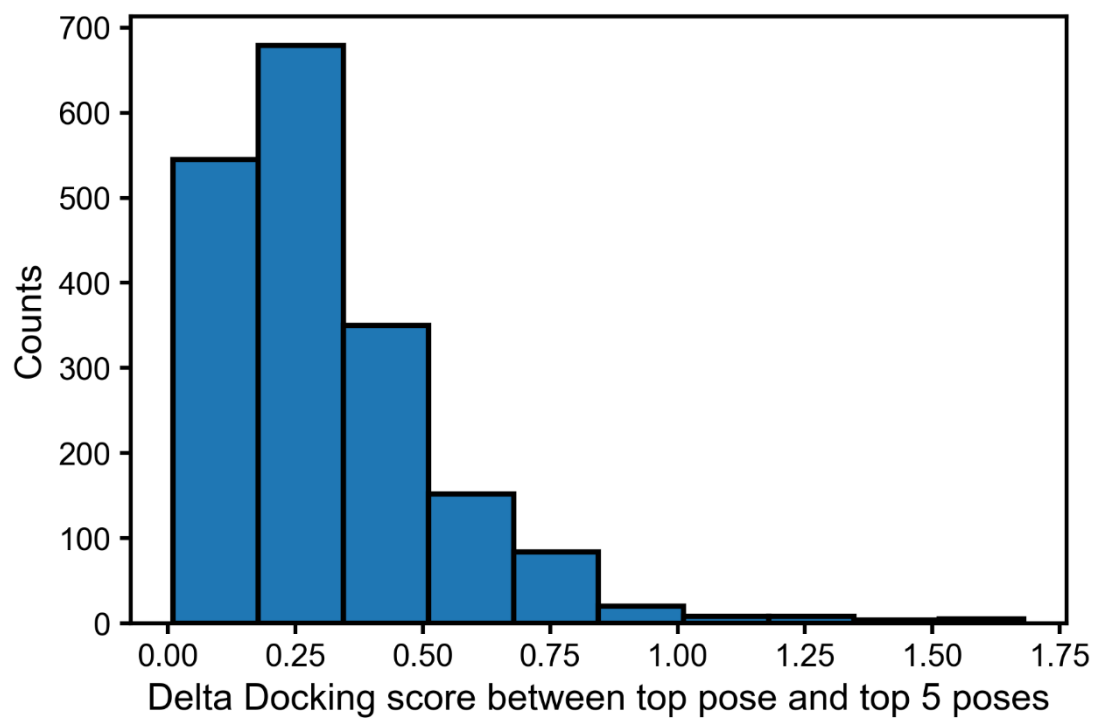

**Figure S2.** Distribution of the variation of docking scores for the best 5 poses.

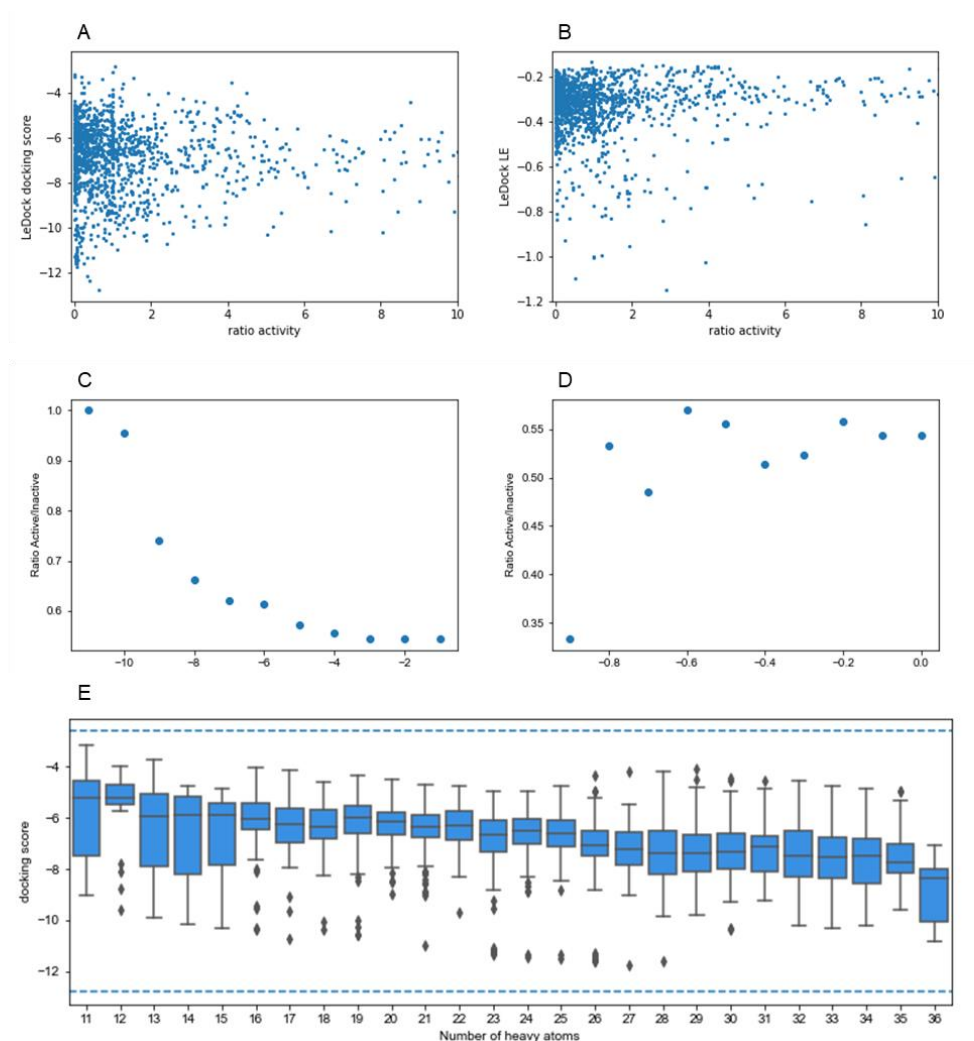

**Figure S3.** A) Docking score distribution as a function of activity of compound compared to control thiourea or acetohydroxamic acid; B) ligand efficiency normalized docking score as a function of activity ratio to remove effects of molecular weight in the docking score; C) Correlation of docking score with probability of finding an active class compound; D) No correlation was found for ligand efficiency normalized docking score; E) Docking Score distribution as a function of the number of heavy atoms where no significant correlation was found.

**Table S1.** Average number of interactions by type of interaction

|                         | <b>Average number of interactions per compound</b> |                       |
|-------------------------|----------------------------------------------------|-----------------------|
| <b>Type interaction</b> | <b>Active class</b>                                | <b>Inactive class</b> |
| Hydrophobic             | 1.249                                              | 1.179                 |
| Hydrogen Bonds          | 2.747                                              | 2.914                 |
| Pi-cation               | 0.306                                              | 0.237                 |
| Metal                   | 0.740                                              | 0.925                 |
| Salt Bridges            | 0.125                                              | 0.192                 |
| Pi-stacking             | 0.169                                              | 0.142                 |
| Halogen bonds           | 0.044                                              | 0.030                 |

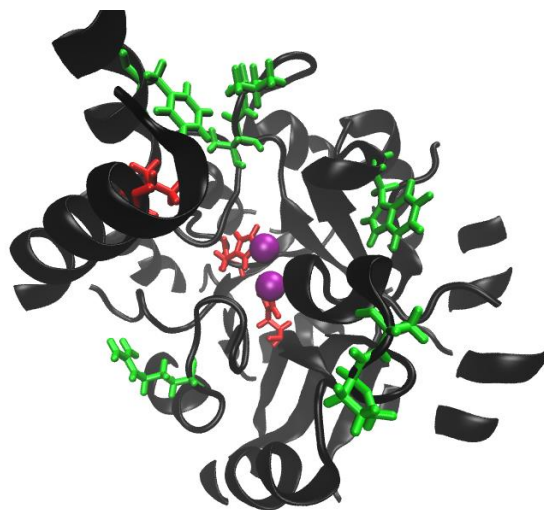

**Figure S4.** Fold activity (green) and inactivity (red) residues Pink represents the metal centre ions. The highlighted green residues are ALA-435, PRO-434, ARG-639, LEU-523, TRP-495, PHE-605 and THR-522. The highlighted red residues include LEU-589, HIS-545 and HIS-407.

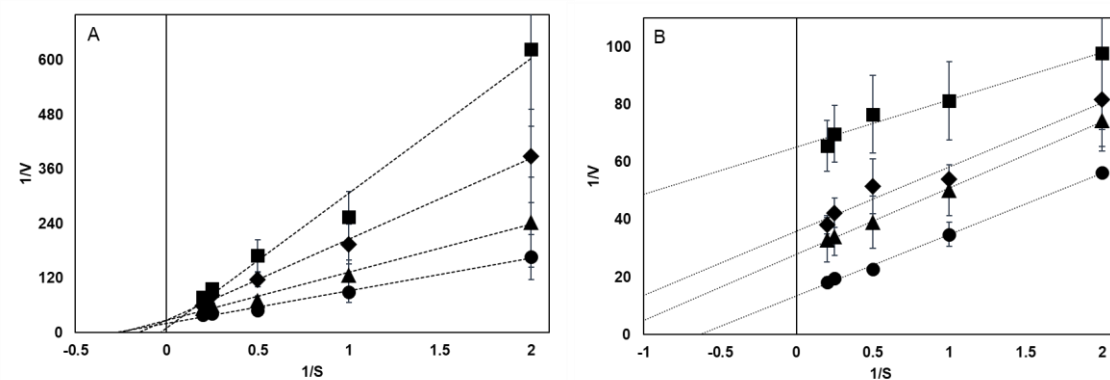

**Figure S5.** Lineweaver-Burk plots for enzymatic kinetics of the reciprocal of reaction rate vs the reciprocal of the substrate (urea) in the absence and presence of 0.5-100  $\mu\text{M}$  of A) compound 2 (mixed-type inhibition) and B) compound 3 (uncompetitive).
